# Supplementary figures and images for: Evolution of mitochondrial RNA editing in extant gymnosperms
Source: PubMed Central journal article supplement — Plant J. 2022 Aug 5;111(6):1676–87. doi: 10.1111/tpj.15916 (PMC9545813; doi:10.1111/tpj.15916), 2022-08-05

Figure S9

E2

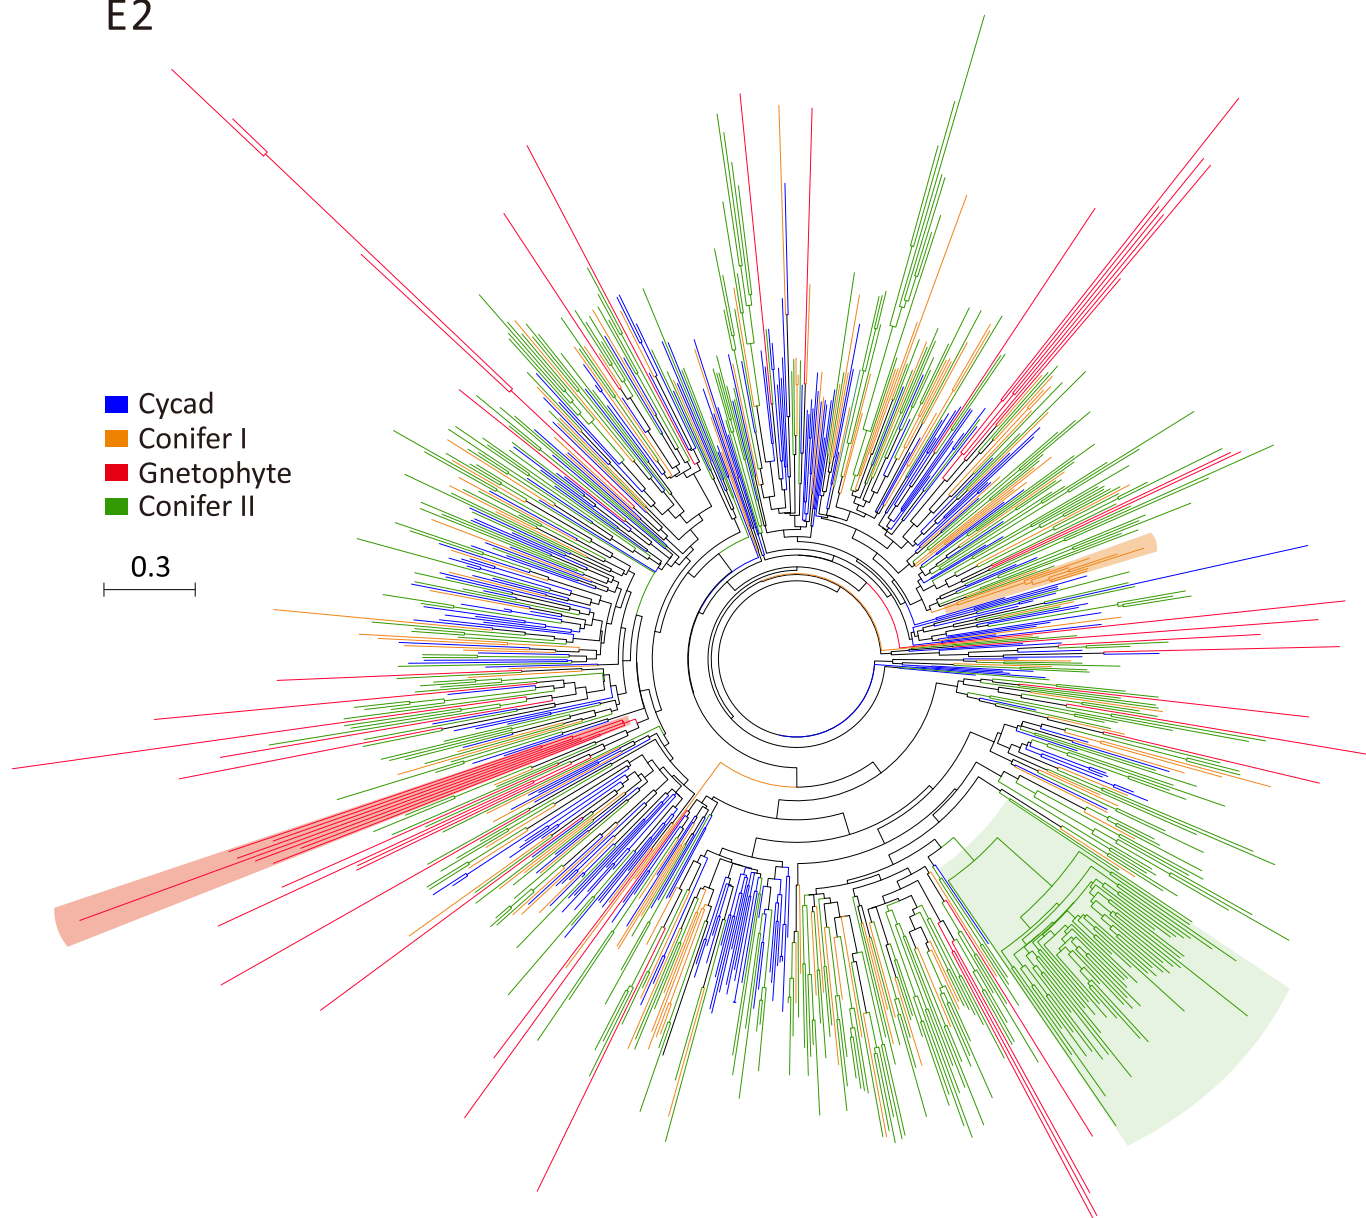

Supplement: TPJ-111-1676-s001.pdf [file TPJ-111-1676-s001.pdf]

Figure S2

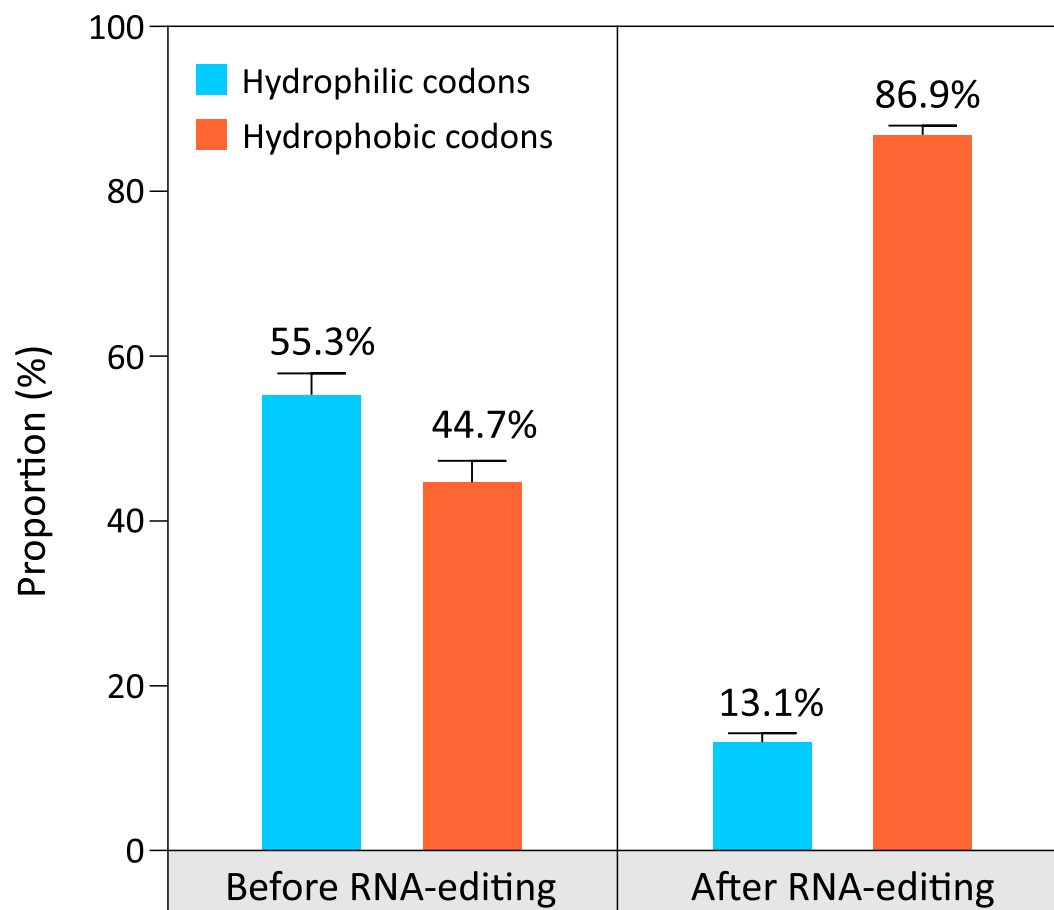

Supplement: TPJ-111-1676-s003.pdf [file TPJ-111-1676-s003.pdf]

Figure S6

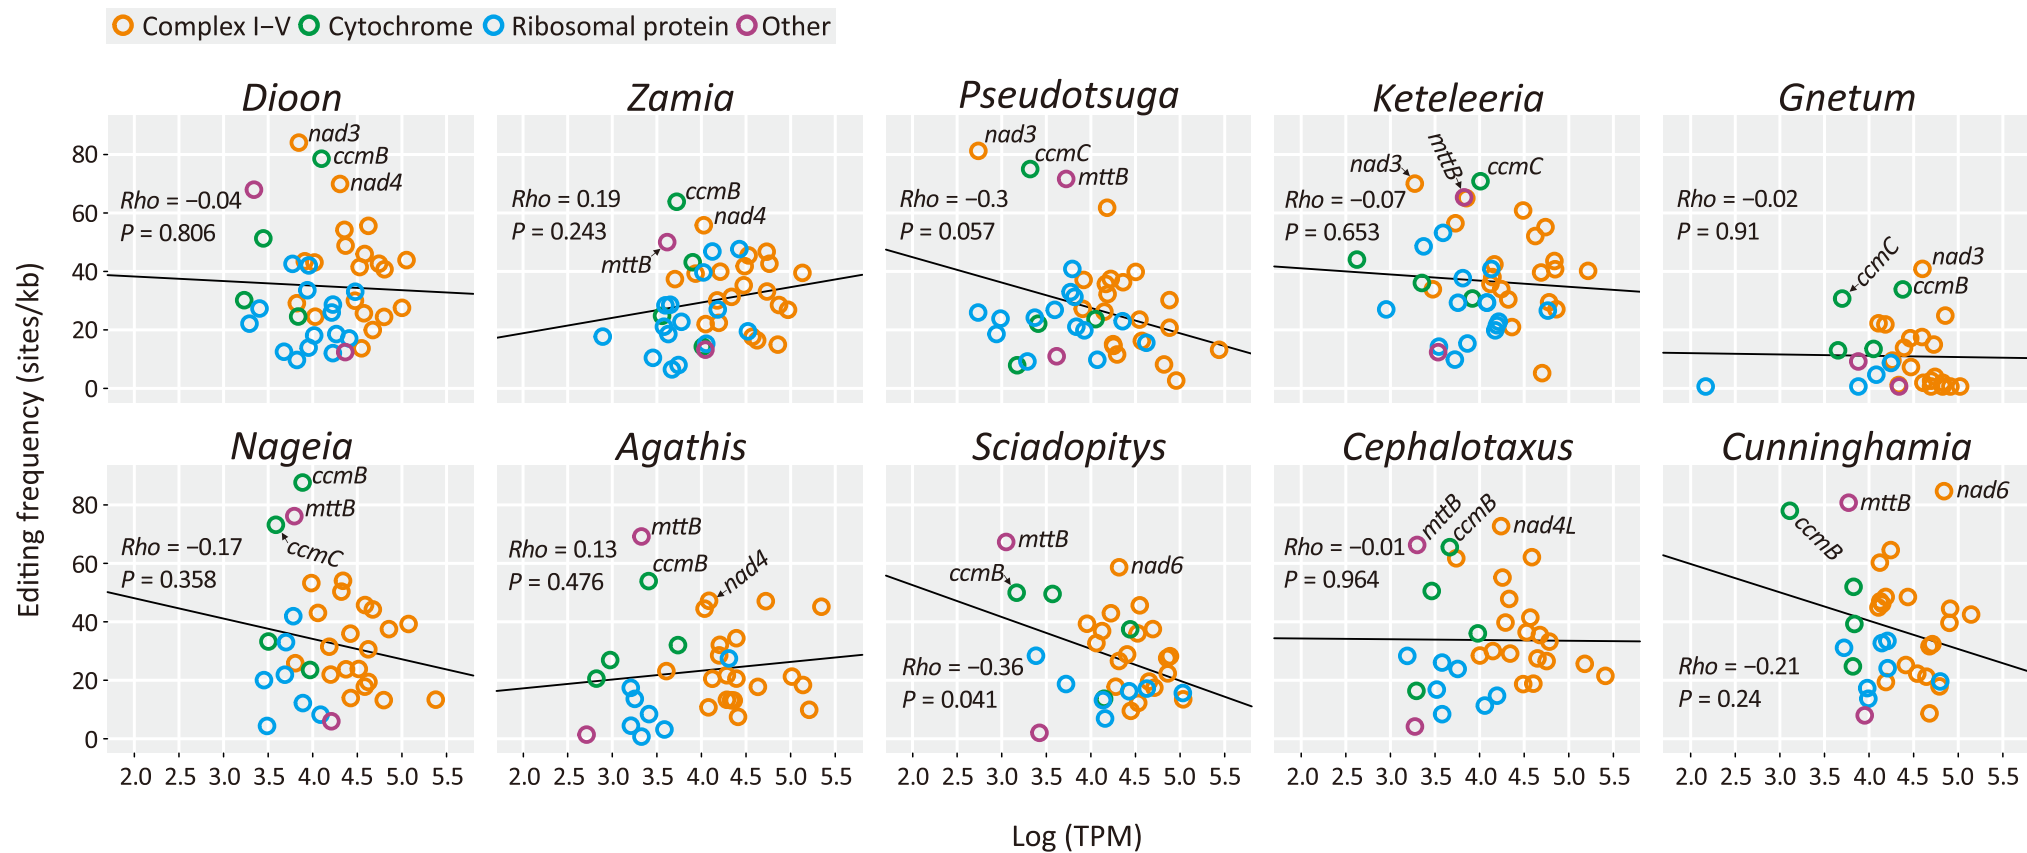

Supplement: TPJ-111-1676-s004.pdf [file TPJ-111-1676-s004.pdf]

Figure S5

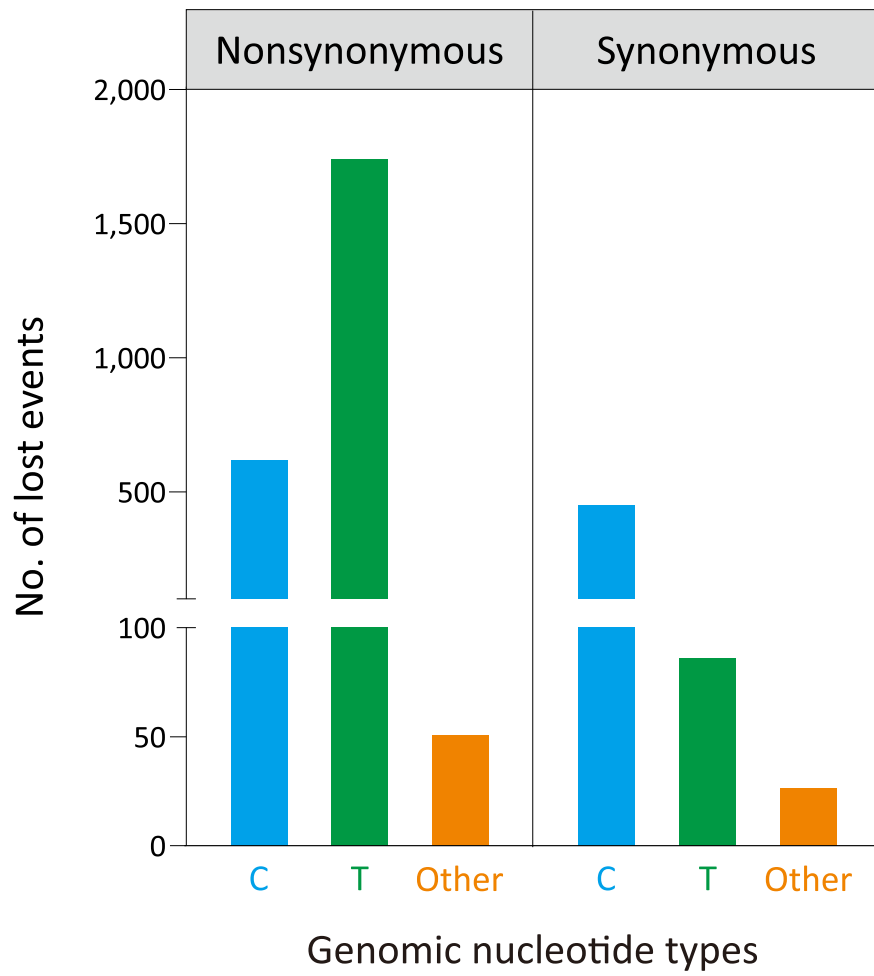

Supplement: TPJ-111-1676-s005.pdf [file TPJ-111-1676-s005.pdf]

Figure S8

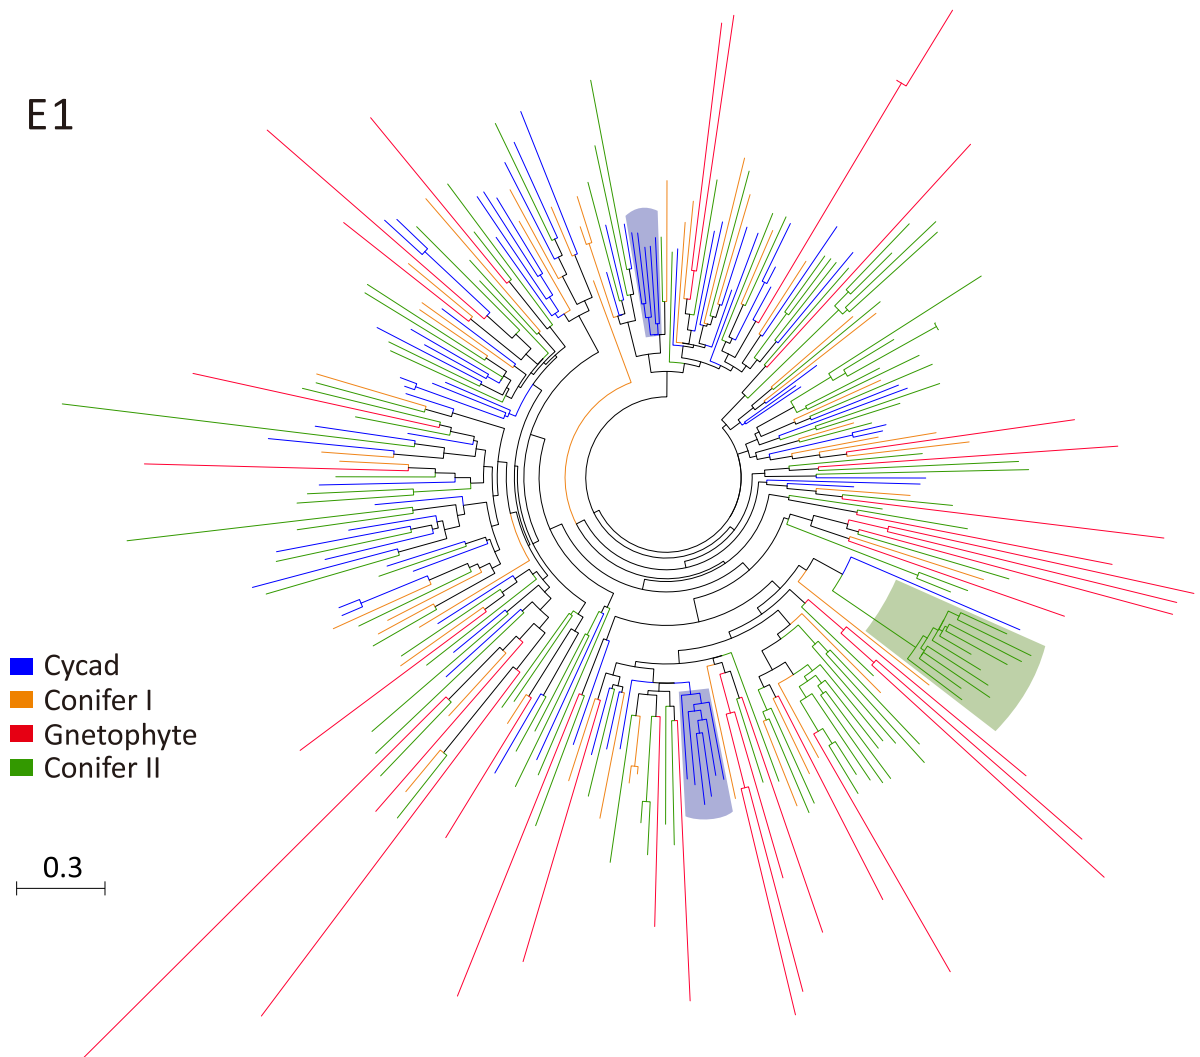

Supplement: TPJ-111-1676-s007.pdf [file TPJ-111-1676-s007.pdf]

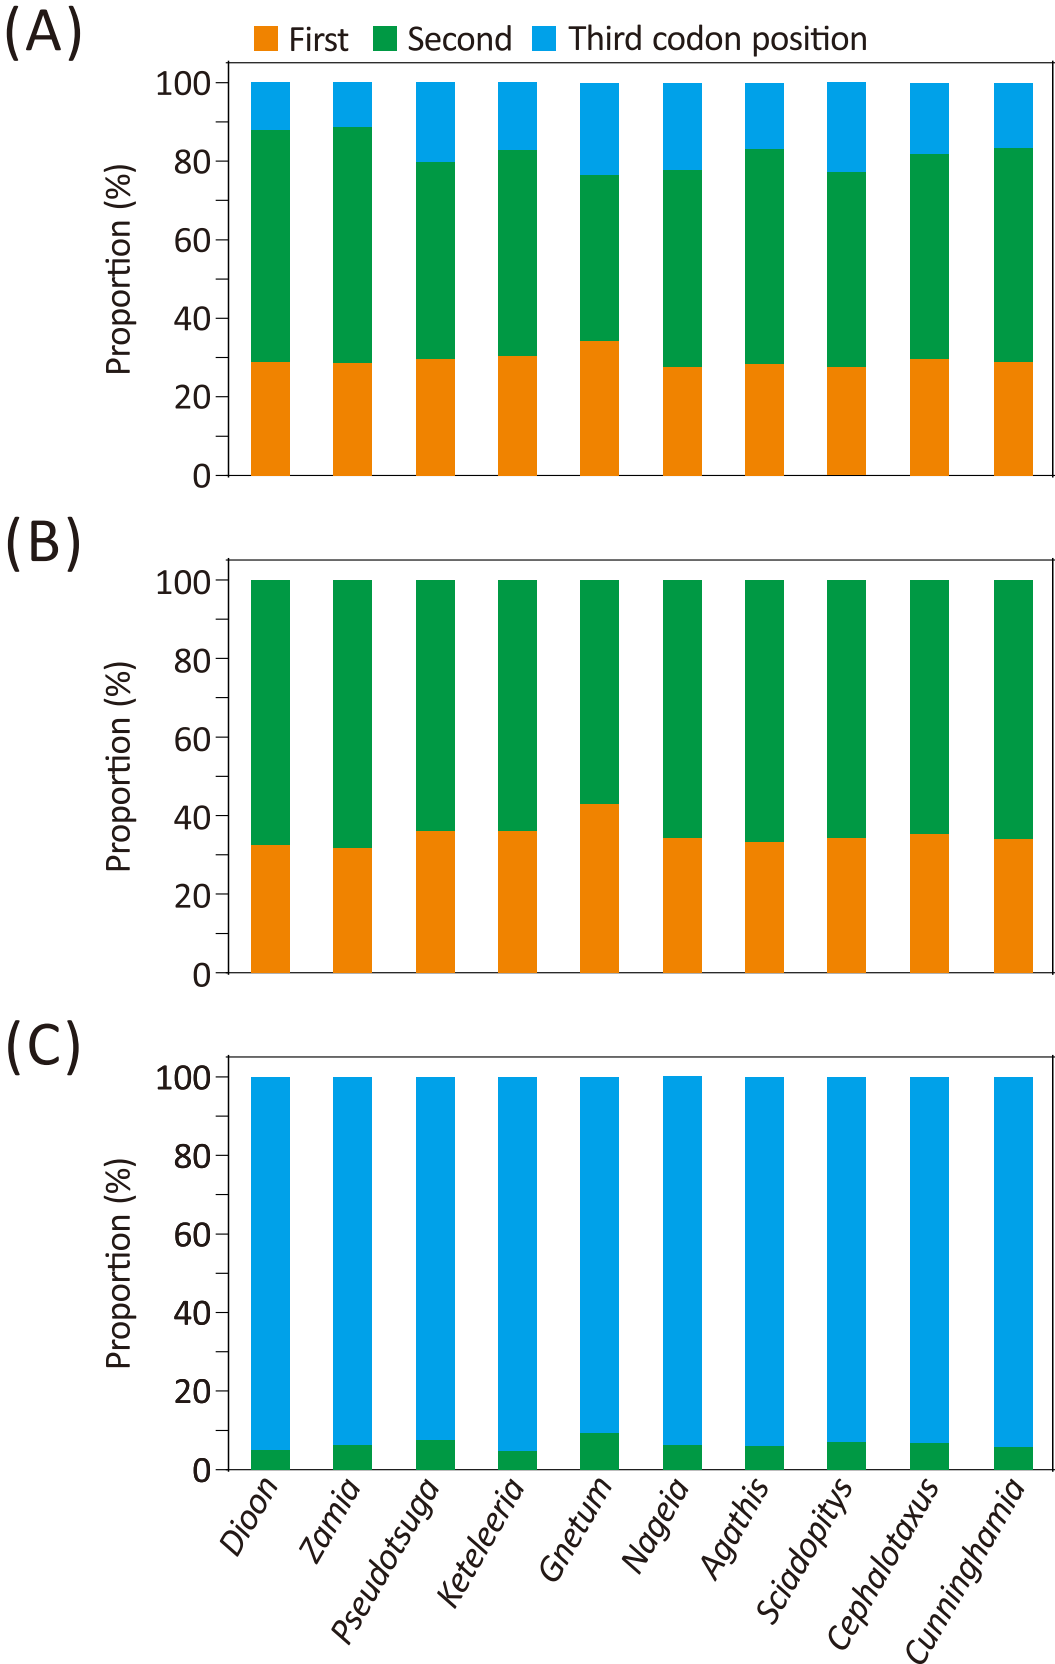

Supplement: TPJ-111-1676-s008.pdf [file TPJ-111-1676-s008.pdf]

Figure S11

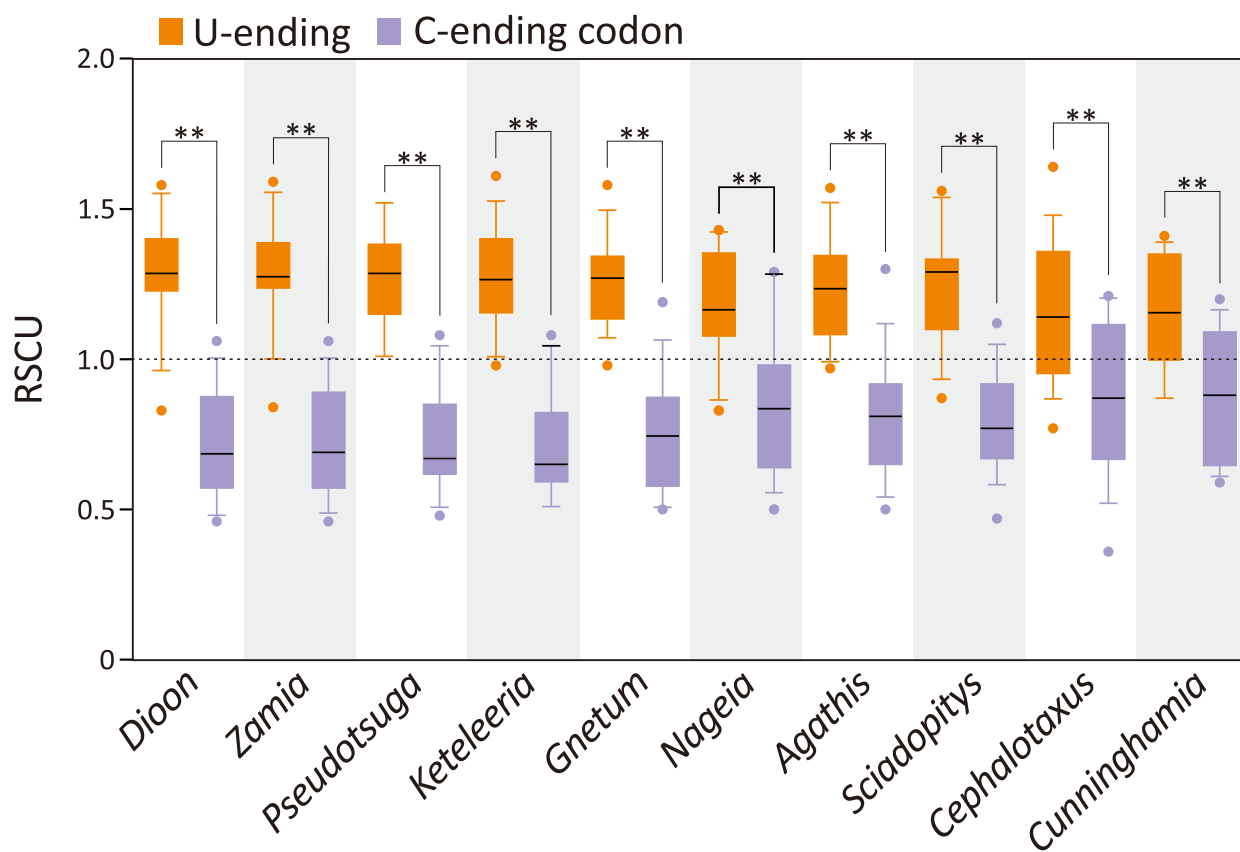

Supplement: TPJ-111-1676-s009.pdf [file TPJ-111-1676-s009.pdf]

Figure S4

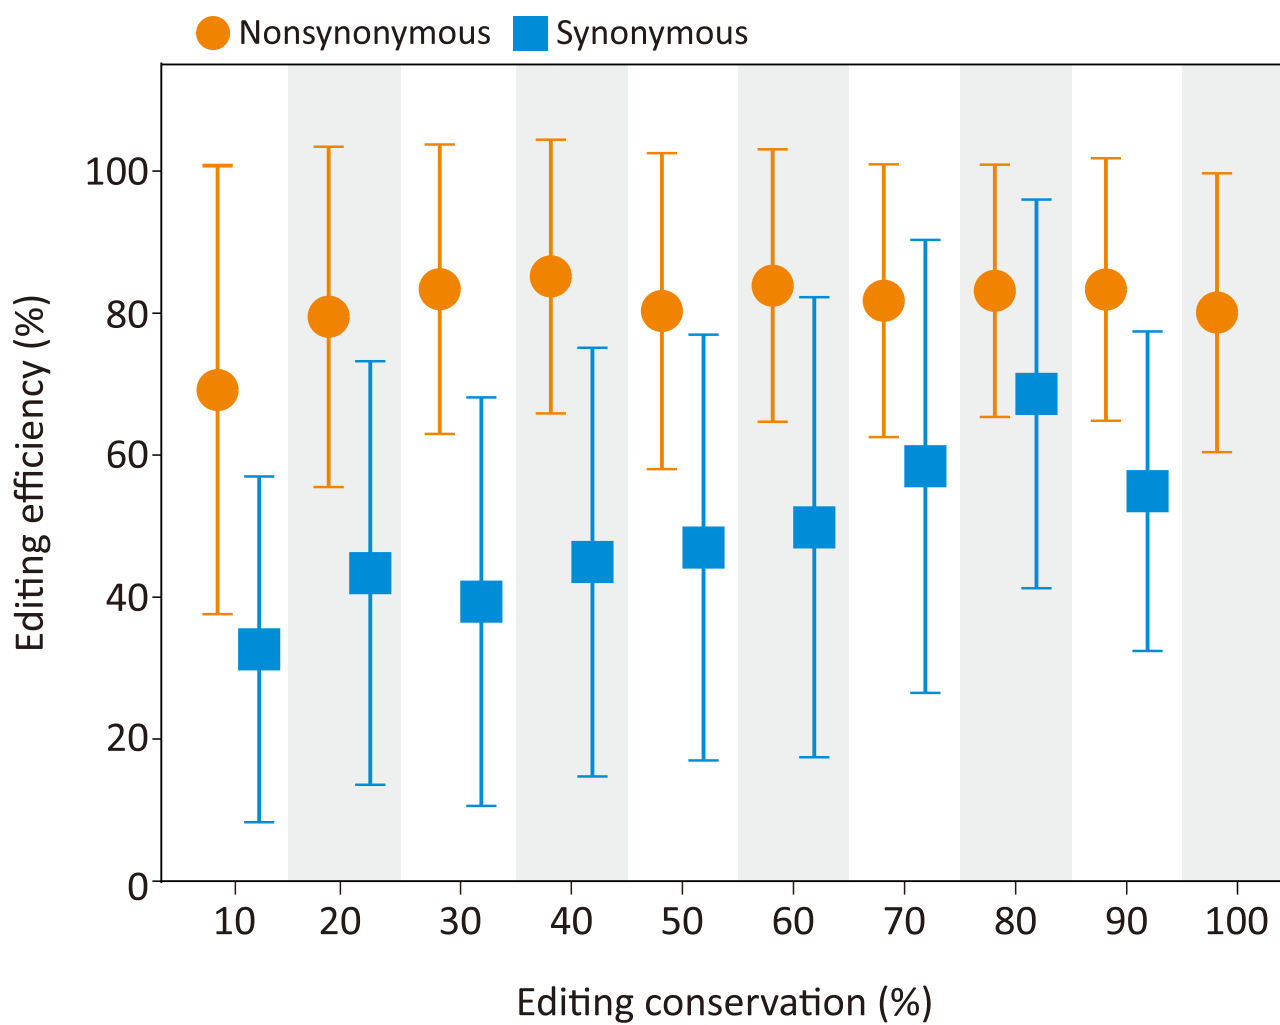

Supplement: TPJ-111-1676-s010.pdf [file TPJ-111-1676-s010.pdf]

Figure S7

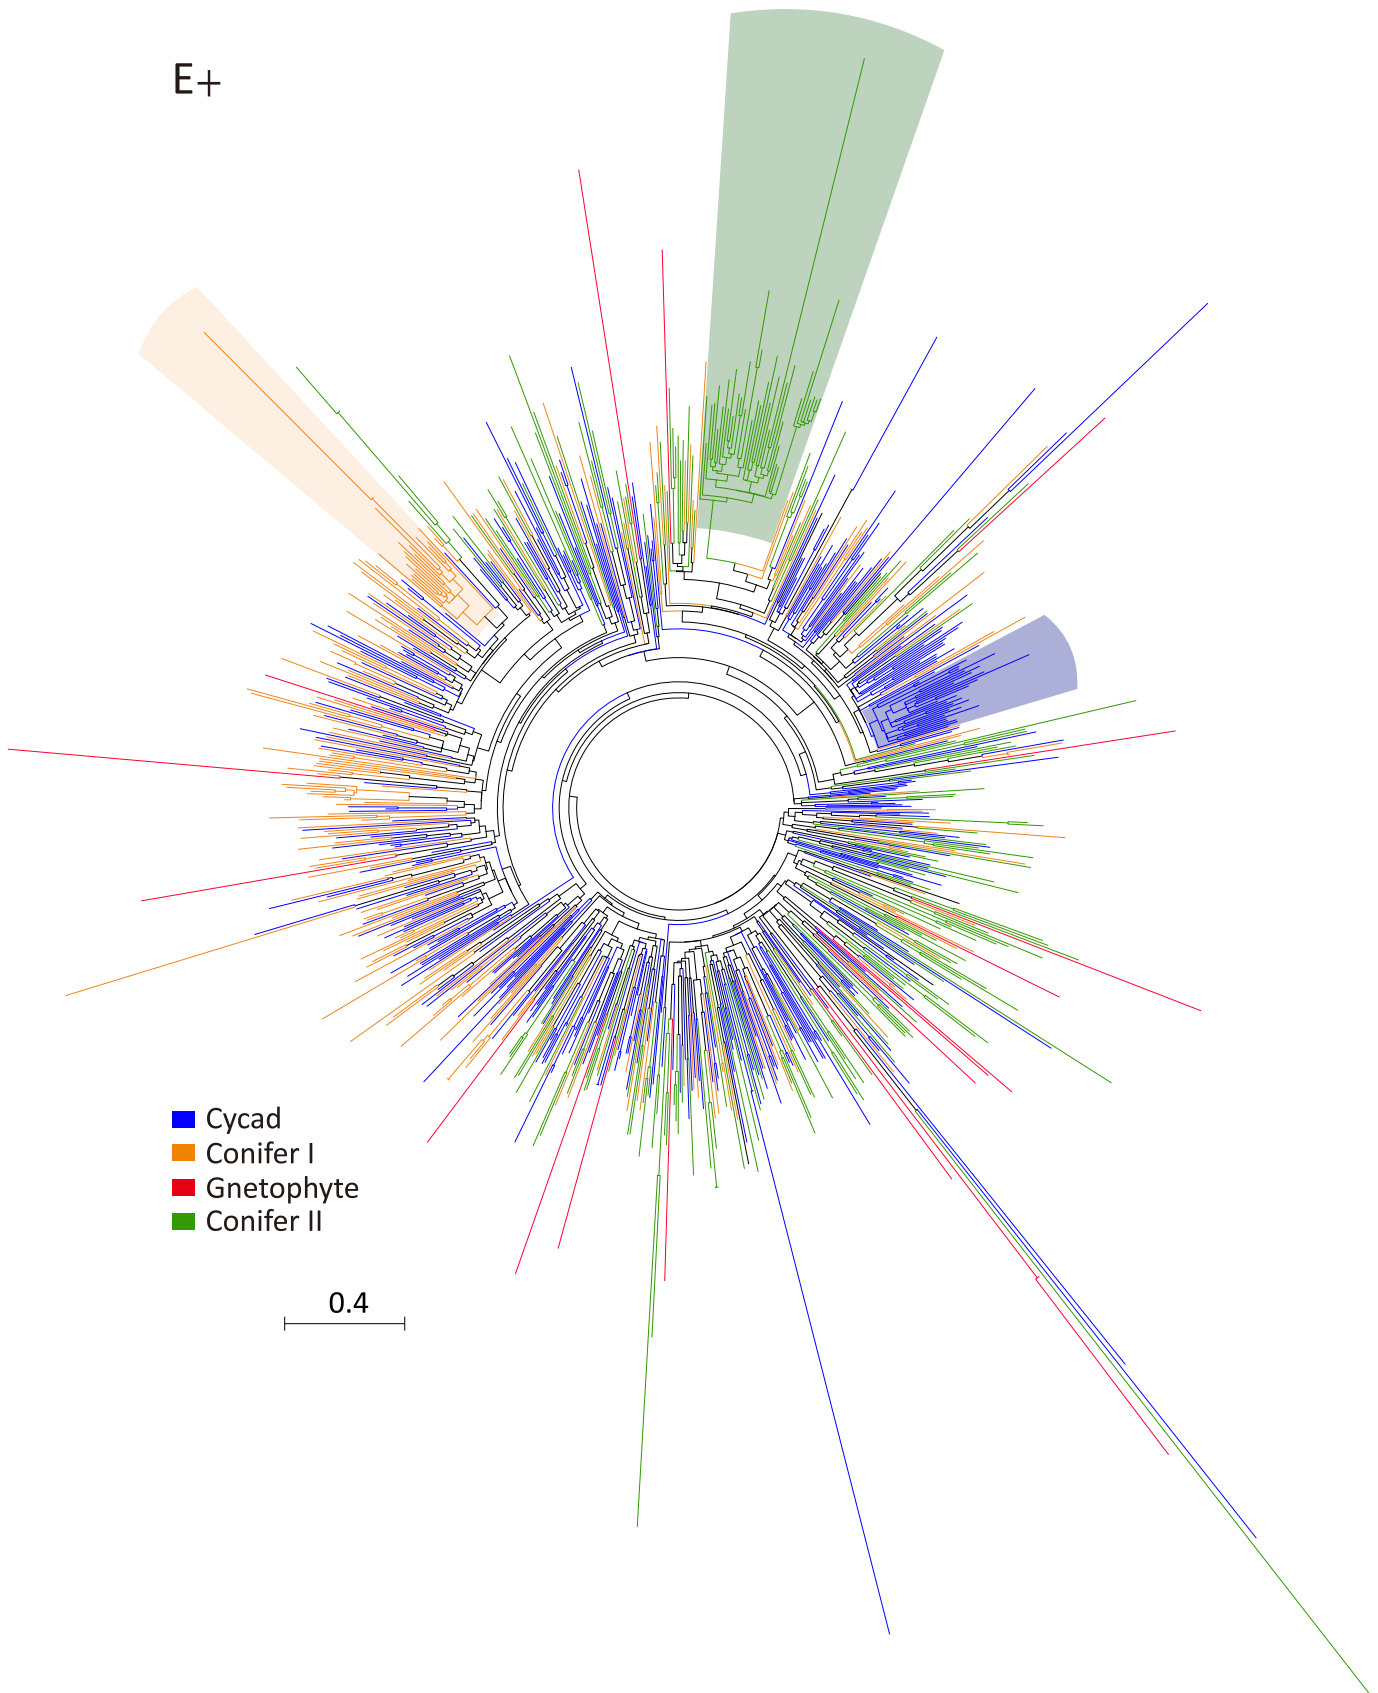

Supplement: TPJ-111-1676-s011.pdf [file TPJ-111-1676-s011.pdf]

Figure S10

DYW

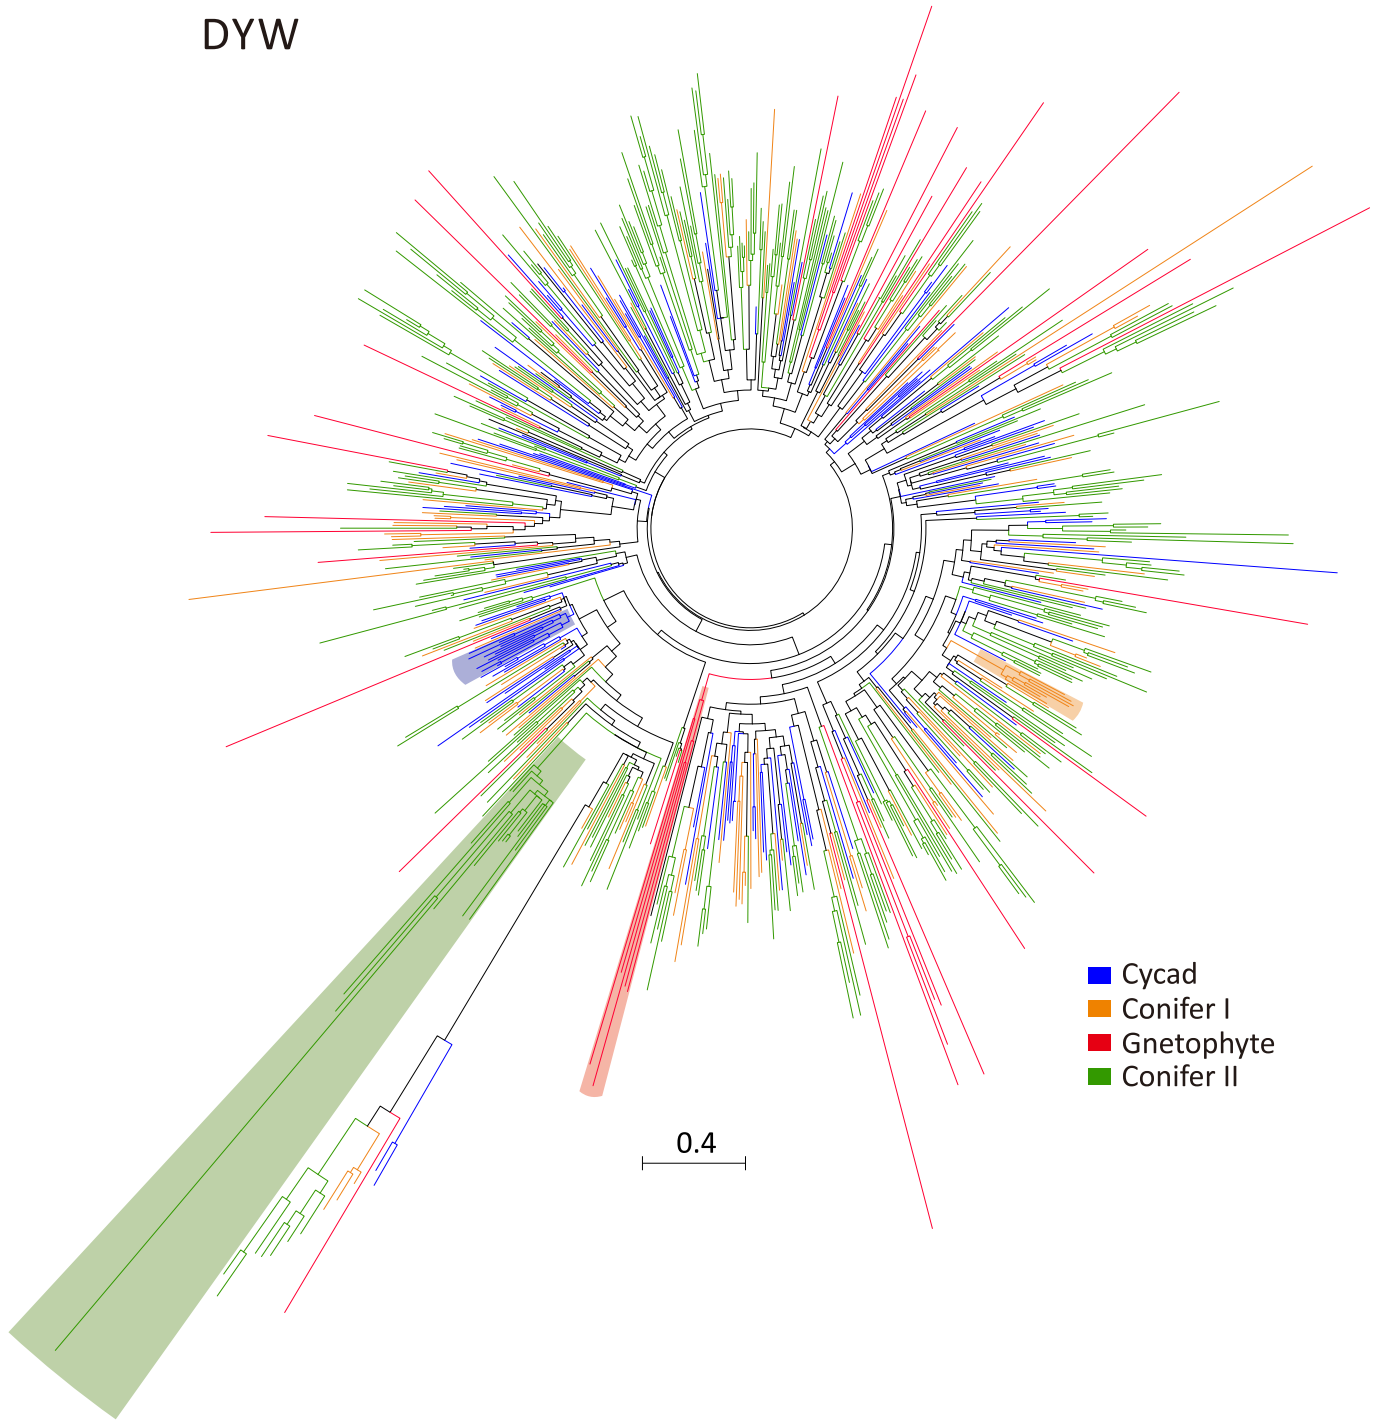

Supplement: TPJ-111-1676-s013.pdf [file TPJ-111-1676-s013.pdf]
